# Supplementary material for: Cerebellar output neurons impair non-motor behaviors by altering development of extracerebellar connectivity
Source: PubMed Central journal article supplement — bioRxiv. 2024 Jul 8:2024.07.08.602496. Preprint. [Version 1] doi: 10.1101/2024.07.08.602496 (PMC11257463; doi:10.1101/2024.07.08.602496), 2024-07-08
Supplement: NIHPP2024.07.08.602496V1-supplement-1.pdf [file NIHPP2024.07.08.602496V1-supplement-1.pdf]

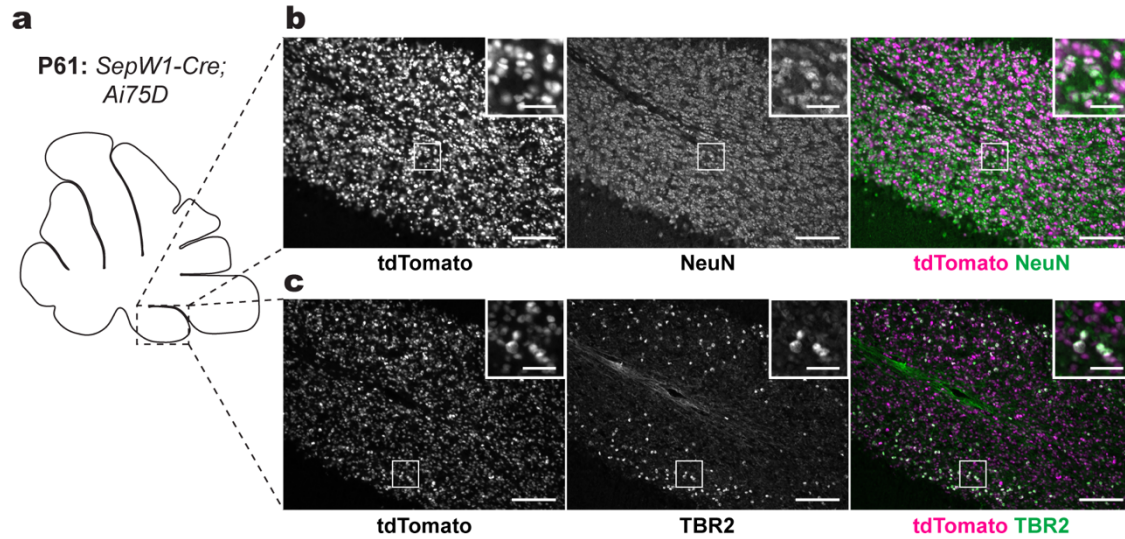

1393

1394 **Supplementary Fig. 1 | *SepW1-Cre* recombines in granule cells and unipolar brush cells.**

1395 **a**, Schematic representation of sagittal plane of an adult mouse showing where **b** and **c** images  
1396 were acquired.

1397 **b**, Immunofluorescence images of tdTomato (magenta) and NeuN (green) co-expressing granule  
1398 cells in adult *SepW1-Cre*; *Ai75D* mice. Scale bars = 100 μm; inset scale bars = 25 μm.

1399 **c**, Immunofluorescence images of tdTomato (magenta) and TBR2 (green) co-expressing unipolar  
1400 brush cells in adult *SepW1-Cre*; *Ai75D* mice. Scale bars = 100 μm.

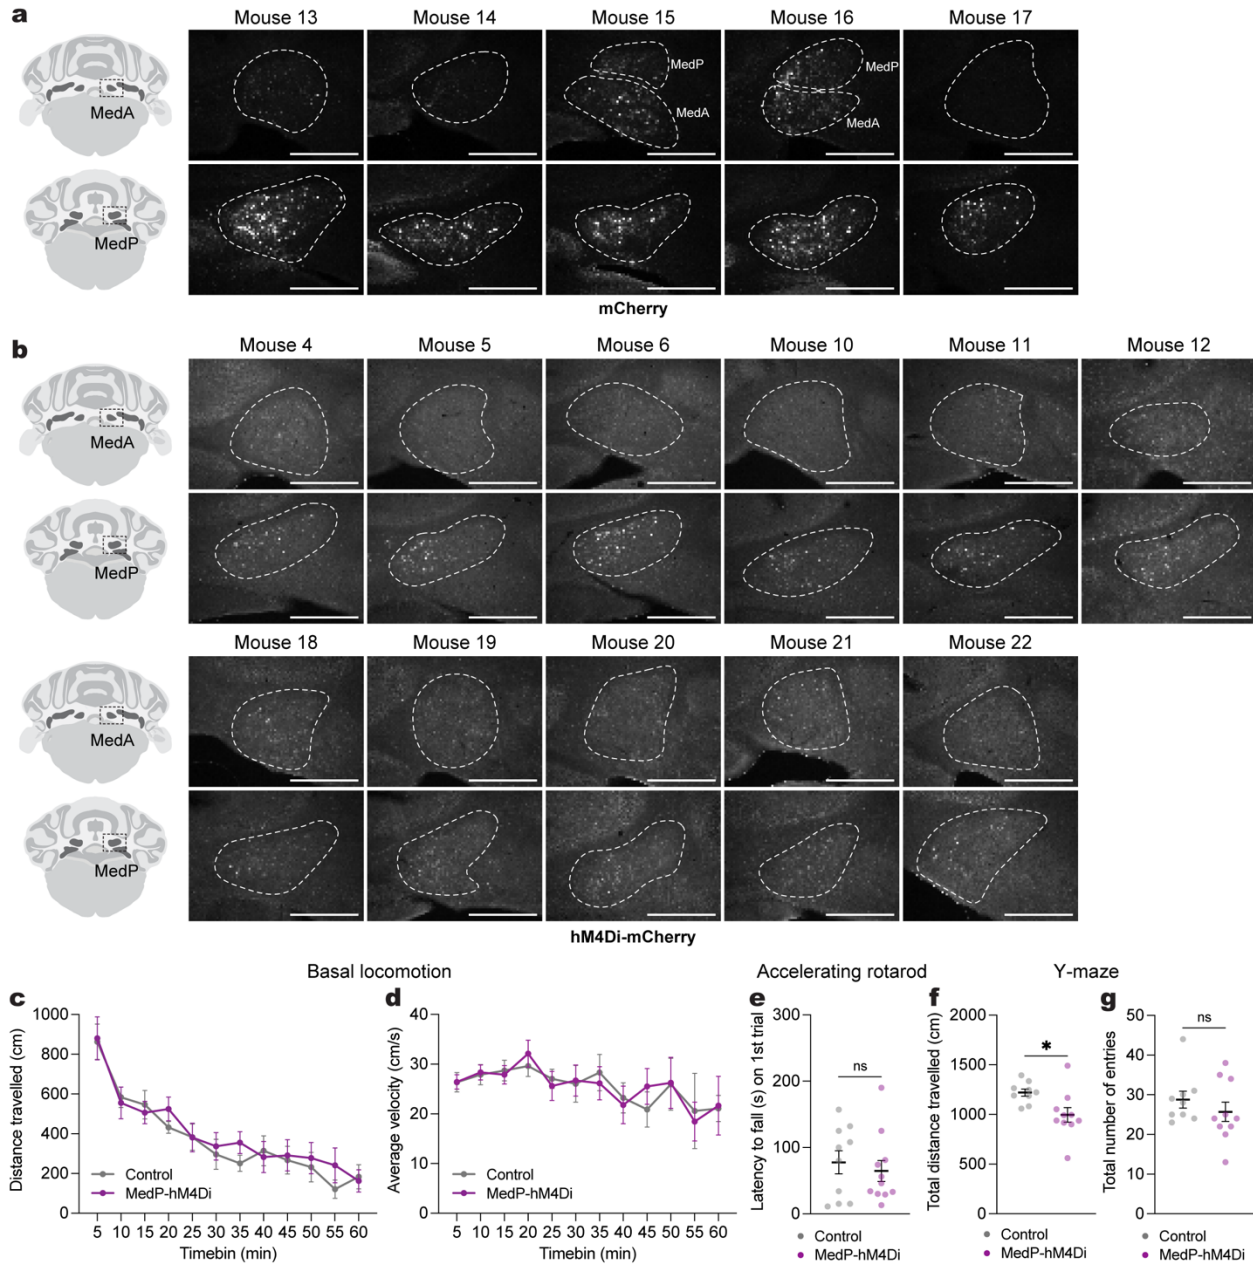

1401

1402 **Supplementary Fig. 2 | Motor coordination during behavior is largely intact after acute**  
 1403 **chemogenetic inhibition of adult MedP eCN.**

1404 **a**, Schematic (left) and representative images of mCherry expression (right) in MedA (upper row)  
 1405 and MedP (lower row) CN in the five control mice. The other six control mice were Cre-negative  
 1406 (treated with CNO). Scale bars = 500  $\mu$ m.

1407 **b**, Schematic (left) and representative images of hM4Di-mCherry expression (right) in MedA and  
1408 MedP CN in the eleven MedP-hM4Di mice. Scale bars = 500  $\mu$ m.

1409 **c**, Distance travelled during basal locomotion by 5 min time bins (n=11 per group). Repeated  
1410 measure two-way ANOVA: no main effect of time ( $P = 0.0609$ ), chemogenetics ( $P = 0.9730$ ) or  
1411 interaction ( $P = 0.9975$ ).

1412 **d**, Average velocity during basal locomotion by 5 min time bins (n=11 per group). Repeated  
1413 measure two-way ANOVA: main effect of time ( $F_{4,870,97.41} = 28.43$ ,  $P < 0.0001$ ), but not of  
1414 chemogenetics ( $P = 0.7000$ ) or interaction ( $P = 0.8668$ ).

1415 **e**, Latency to fall on the first trial of the accelerating rotarod test (MedP-hM4Di: n=11, control:  
1416 n=10; Mann Whitney  $U$  test:  $U = 48$ ,  $P = 0.6412$ ).

1417 **f**, Total distance travelled in the Y-maze (MedP-hM4Di: n=10, control: n=9; two-tailed unpaired t-  
1418 test:  $t_{17} = 2.648$ ,  $P = 0.0169$ ).

1419 **g**, Total number of arm entries in the Y-maze (MedP-hM4Di: n=10, control: n=9; Mann Whitney  
1420  $U$  test:  $U = 30$ ,  $P = 0.2326$ ).

1421 ns, not significant:  $P \geq 0.05$ . Data are presented as mean values  $\pm$  SEM.

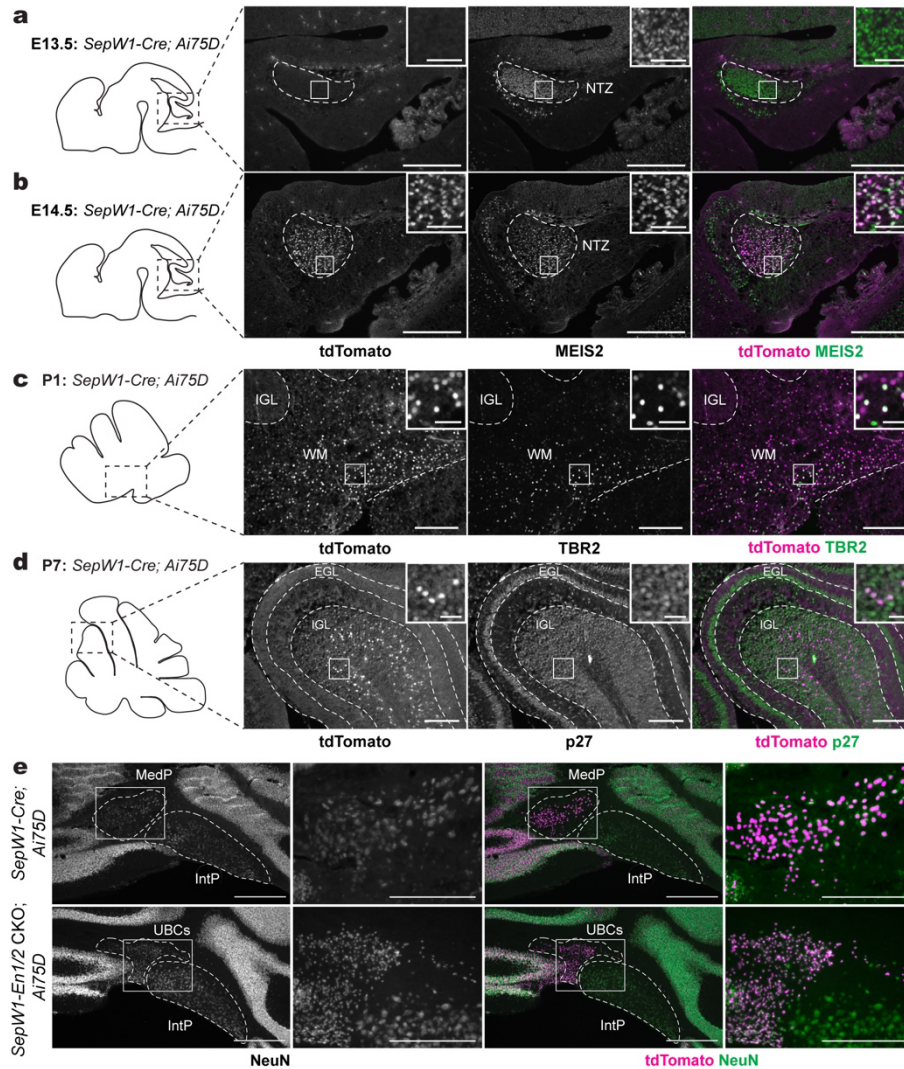

1422

1423 **Supplementary Fig. 3 | *SepW1-Cre* recombines in the developing excitatory cerebellar**  
1424 **neurons and *SepW1-En1/2* CKOs have preferential loss of MedP CN.**

1425 **a,b,** Schematic (left) and representative images (right) of sagittal sections stained for tdTomato  
1426 (magenta) in *SepW1-Cre; Ai75D* mice showing recombination at E14.5 (b) but not at E13.5 (a) in  
1427 eCN in the NTZ marked by MEIS2 (green). NTZ = nuclear transitory zone.

1428 **c,** Schematic (left) and representative sagittal image (right) of tdTomato (magenta) expression in  
1429 *SepW1-Cre; Ai75D* mice showing recombination at postnatal day (P1) in TBR2+ (green) unipolar  
1430 brush cells.



1431 **d**, Schematic (left) and representative sagittal images (right) of tdTomato (magenta) expression  
1432 in *SepW1-Cre; Ai75D* mice showing recombination at P7 in p27+ (green) differentiated granule  
1433 cells in the internal granule cell layer (IGL), but not in proliferating granule cell precursors in the  
1434 external granule cell layer (EGL). Scale bars = 100  $\mu$ m; inset scale bars = 20  $\mu$ m.

1435 **e**, Representative images of coronal sections stained for NeuN (single channel), NeuN (green)  
1436 and tdTomato (magenta) co-labeling in the posterior CN of *SepW1-Cre; Ai75D* and *SepW1-En1/2*  
1437 *CKO; Ai75D* mice (*SepW1-Cre/+; En1<sup>flox/flox</sup>; En2<sup>flox/flox</sup>; R26<sup>LSL-nls-tdTomato/+</sup>*). NeuN labeling near the  
1438 MedP of mutants are ectopic unipolar brush cells that are not TBR2+ or MEIS2+ (confirmed in  
1439 Krishnamurthy et al., 2024). Abbreviations: MedP=Posterior medial; IntP=Posterior interposed.  
1440 Scale bars for low magnification = 500  $\mu$ m; scale bars for high magnification = 100  $\mu$ m.  
1441 Scale bars in **a**, **b**, **c** = 250  $\mu$ m; inset scale bars = 50  $\mu$ m.

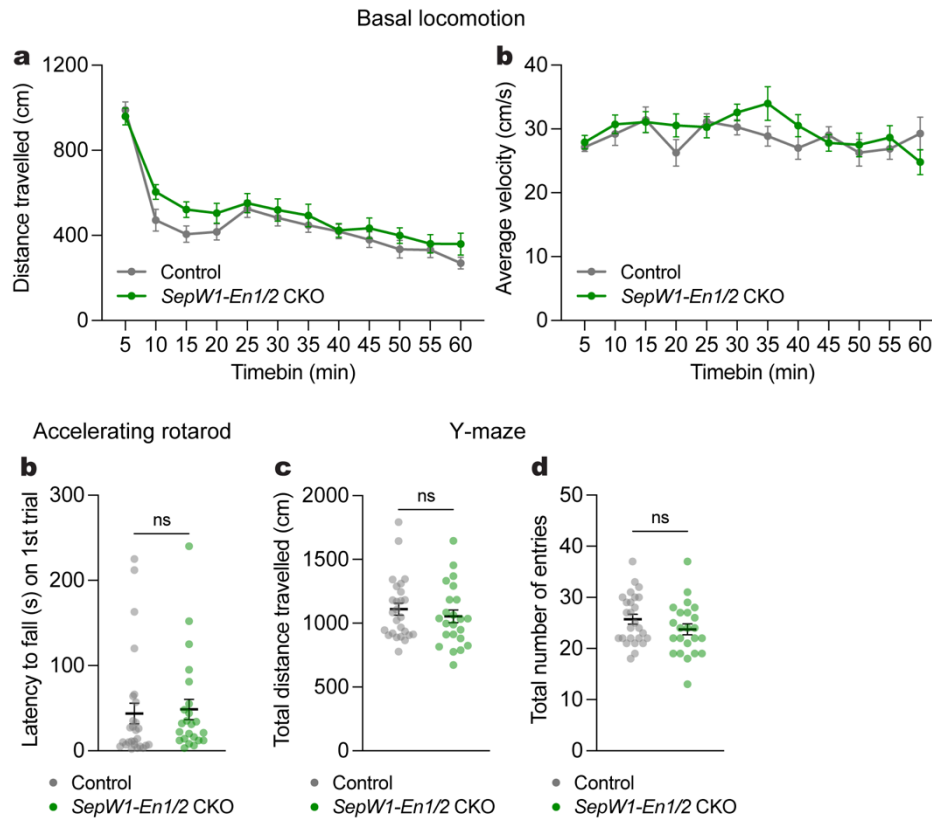

1442

1443 **Supplementary Fig. 4 | Motor coordination during behaviors is not altered in *SepW1-En1/2***

1444 **CKOs.**

1445 **a**, Distance travelled during basal locomotion by 5 min time bins (*SepW1-En1/2* CKOs: n=24,  
1446 littermate controls: n=27). Repeated measure two-way ANOVA: main effect of time ( $F_{5,410,265.1} =$   
1447 71.20,  $P < 0.0001$ ), but not of genotype ( $P = 0.2081$ ) or interaction ( $P = 0.2042$ ).

1448 **b**, Average velocity during basal locomotion by 5 min time bins (*SepW1-En1/2* CKOs: n=24,  
1449 littermate controls: n=27). Repeated measure two-way ANOVA: main effect of time ( $F_{7,996,390.3} =$   
1450 2.386,  $P = 0.0162$ ), but not of genotype ( $P = 0.3429$ ) or interaction ( $P = 0.1806$ ).

1451 **c**, Latency to fall on the first trial of the accelerating rotarod test (*SepW1-En1/2* CKOs: n=23,  
1452 littermate controls: n=27; Mann-Whitney  $U$  test:  $U = 240.5$ ,  $P = 0.1759$ ).

1453 **d**, Total distance travelled in the Y-maze (*SepW1-En1/2* CKOs: n=23, littermate controls: n=26;  
1454 Mann-Whitney  $U$  test:  $U = 266$ ,  $P = 0.5184$ ).

- 1455 e, Total number of arm entries in the Y-maze (*SepW1-En1/2* CKOs: n=23, littermate controls:  
1456 n=26; two-tailed unpaired t-test:  $t_{47} = 1.397$ ,  $P = 0.1689$ ).  
1457 ns, not significant:  $P \geq 0.05$ . Data are presented as mean values  $\pm$  SEM.

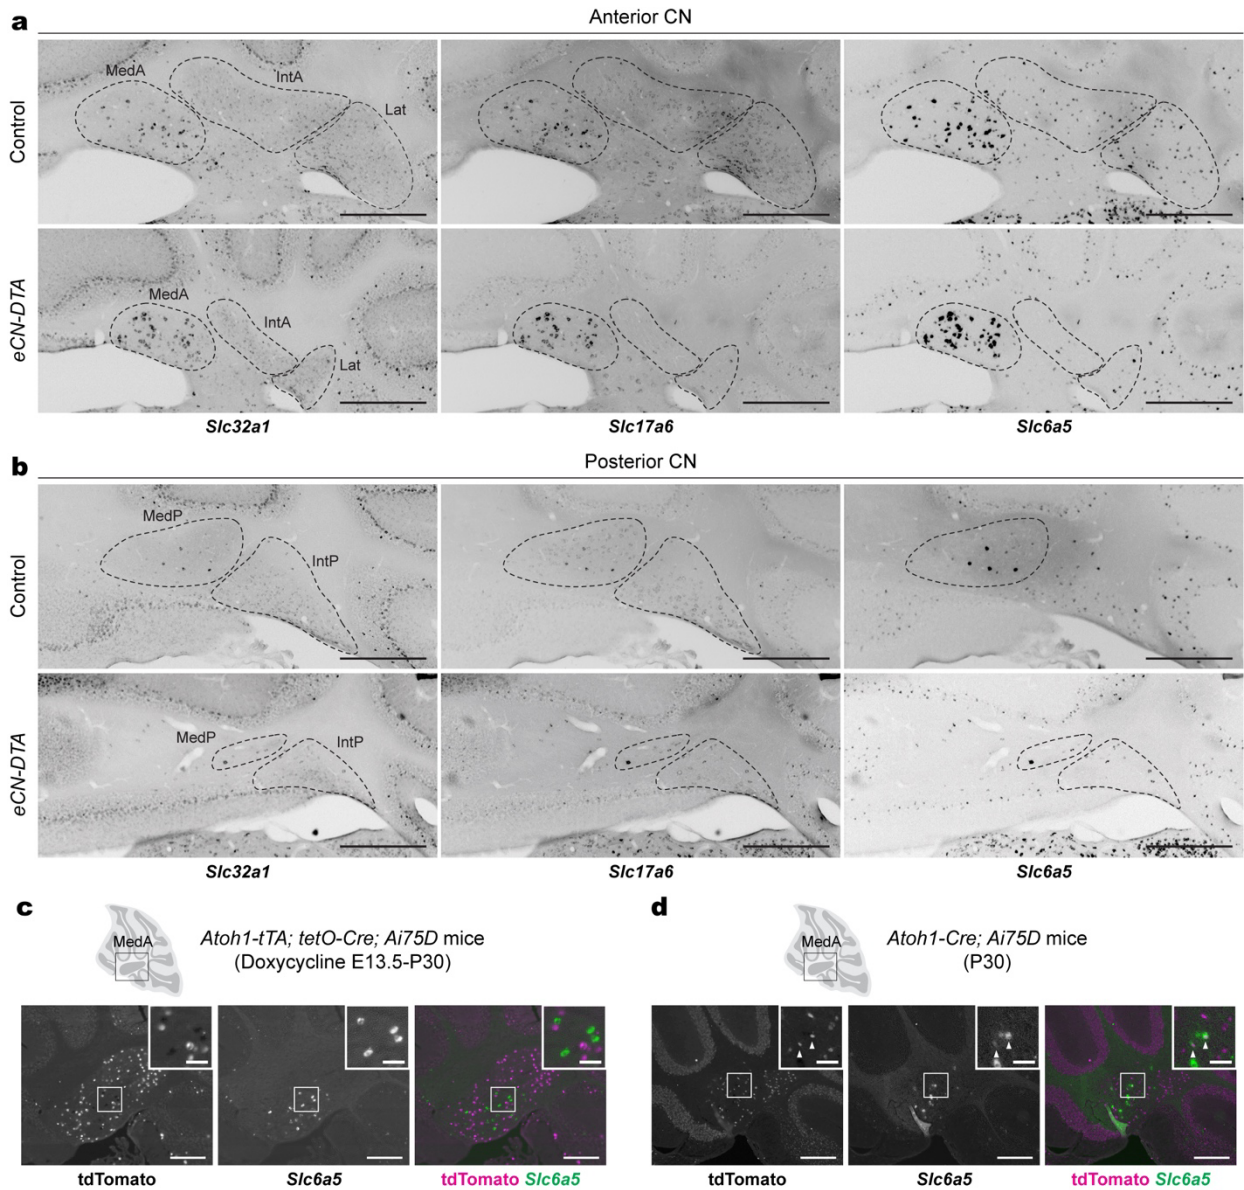

1458

1459 **Supplementary Fig. 5 | Remaining CN neurons in eCN-DTA mice are inhibitory neurons.**

1460 **a,b**, Representative images of coronal sections of triple RNA *in situ* analysis of *Slc32a1*, *Slc17a6*

1461 and *Slc6a5* with single channel expression in anterior (**a**) and posterior (**b**) CN of eCN-DTA mice

1462 and littermate controls. Dotted outlines indicate the CN subregions. Abbreviations: MedA=Anterior

1463 medial; MedP=Posterior medial; IntA=Anterior interposed; IntP=Posterior interposed; Lat=Lateral.

1464 Scale bars = 500  $\mu$ m.

1465 **c**, Representative images from the MedA region of double RNA *in situ* hybridization and

1466 immunofluorescence for *Slc6a5* and tdTomato in P30 *Atoh1-tTA; tetO-Cre; Ai75D* (*Atoh1-tTA/+;*



1467 *tetO-Cre; R26<sup>L<sup>SL-nls-tdTomato</sup>/+</sup>*) mice treated with doxycycline from E13.5 until P30. *Slc6a5*+ CN  
1468 neurons are not labeled by the *Atoh1-tTA* transgene (tdTomato as a readout). Scale bars = 250  
1469 um; inset scale bars = 50 um.

1470 **d**, Representative images from the MedA region of double RNA *in situ* hybridization and  
1471 immunofluorescence for *Slc6a5* and tdTomato in P30 *Atoh1-Cre; Ai75D* mice. Subset of *Slc6a5*+  
1472 CN neurons are labeled by the *Atoh1-Cre* transgene (tdTomato as a readout). Scale bars = 250  
1473 um; inset scale bars = 50 um.

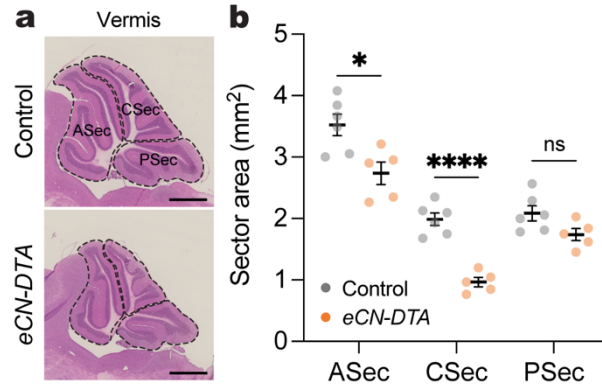

1474

1475 **Supplemental Fig. 6 | eCN-DTA mice show reduced growth in the anterior and central**  
1476 **vermis.**

1477 **a**, Representative images of H&E labeled vermis in eCN-DTA and littermate control mice. Anterior,  
1478 central and posterior sectors (ASec, CSec, and PSec, respectively) are outlined in dotted lines.  
1479 Scale bars = 1 mm.

1480 **b**, Quantification of sector area in eCN-DTA mice (n=5) compared to littermate controls (n=6).  
1481 Ordinary two-way ANOVA: main effect of genotype ( $F_{1,9} = 17.96$ ,  $P = 0.0022$ ), main effect of sector  
1482 ( $F_{1,693,15,23} = 264.6$ ,  $P < 0.0001$ ), and interaction ( $F_{2,18} = 10.65$ ,  $P = 0.0009$ ); with post hoc two-  
1483 tailed t-tests with uncorrected Fisher's LSD for effect of genotype for ASec ( $t_{8,779} = 3.100$ ,  $P =$   
1484  $0.0131$ ), CSec ( $t_{8,706} = 8.001$ ,  $P < 0.0001$ ), and PSec ( $P = 0.0540$ ).

1485 ns, not significant:  $P \geq 0.05$ . Data are presented as mean  $\pm$  SEM.

1486

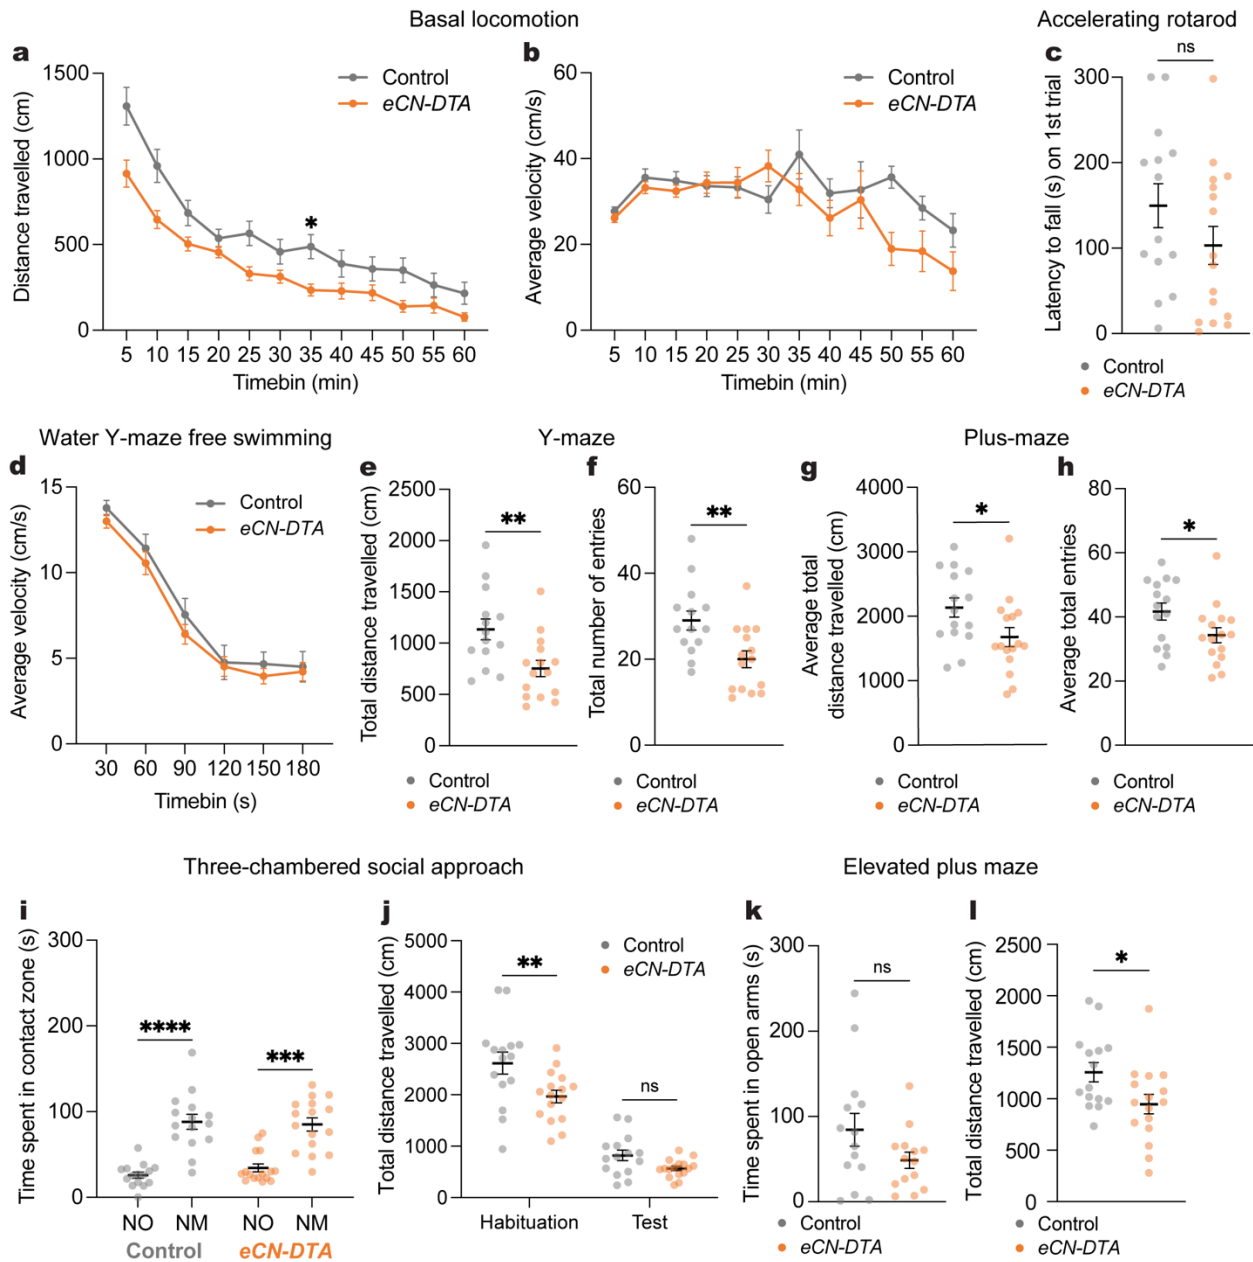

1487

1488 **Supplementary Fig. 7 | Motor coordination during behavior is task-dependent in eCN-DTA**

1489 **mice.**

1490 **a**, Distance travelled during basal locomotion by 5 min time bins (eCN-DTA mice: n=16, littermate

1491 controls: n=15). Repeated measure two-way ANOVA: main effect of time ( $F_{5,410,156.9} = 100.4$ ,  $P <$

1492 0.0001), main effect of genotype ( $F_{1,29} = 8.210$ ,  $P = 0.0077$ ), and interaction ( $F_{11,319} = 2.629$ ,  $P =$

1493 0.0032); with post hoc two-tailed t-tests with Šídák correction for effect of genotype for 30-35 min  
1494 ( $t_{20.48} = 3.245$ ,  $P = 0.0466$ ) but no other comparisons ( $P \geq 0.05$ ).

1495 **b**, Average velocity during basal locomotion by 5 min time bins (*eCN-DTA* mice: n=16, littermate  
1496 controls: n=15). Repeated measure two-way ANOVA: main effect of time ( $F_{5,283,153.2} = 5.057$ ,  $P =$   
1497  $0.0002$ ), but not of genotype ( $P = 0.0883$ ) or interaction ( $P = 0.0589$ ).

1498 **c**, Latency to fall on the first trial of the accelerating rotarod test (*eCN-DTA* mice: n=16, littermate  
1499 controls: n=14; Mann-Whitney *U* test:  $U = 72.50$ ,  $P = 0.1034$ ).

1500 **d**, Average swimming velocity during a three-minute swim (*eCN-DTA* mice: n=16, littermate  
1501 controls: n=15). Repeated measure two-way ANOVA: main effect of time ( $F_{5,145} = 137.8$ ,  $P <$   
1502  $0.0001$ ), but not of genotype ( $P = 0.3829$ ) or interaction ( $P = 0.9235$ ).

1503 **e**, Total distance travelled during the Y-maze test (*eCN-DTA* mice: n=15, littermate controls: n=14;  
1504 two-tailed unpaired t-test:  $t_{27} = 3.027$ ,  $P = 0.0054$ ).

1505 **f**, Total number of arm entries in the Y-maze (*eCN-DTA* mice: n=15, littermate controls: n=14;  
1506 two-tailed unpaired t-test:  $t_{27} = 2.969$ ,  $P = 0.0062$ ).

1507 **g**, Average total distance travelled during two days of testing in the plus-maze (*eCN-DTA* mice:  
1508 n=16, littermate controls: n=15: two-tailed unpaired t-test:  $t_{29} = 2.211$ ,  $P = 0.0350$ ).

1509 **h**, Average total number of entries during two days of testing in the plus-maze (*eCN-DTA* mice:  
1510 n=16, littermate controls: n=15: two-tailed unpaired t-test:  $t_{29} = 2.114$ ,  $P = 0.0432$ ).

1511 **i**, Total time in which the animal's nose was within the contact zone of a novel mouse (NM) and  
1512 novel object (NO) during the three-chambered social approach test (*eCN-DTA* mice: n=16,  
1513 littermate controls: n=15). Repeated measure two-way ANOVA: main effect of location ( $F_{1,29} =$   
1514  $53.64$ ,  $P < 0.0001$ ), but not of genotype ( $P = 0.5828$ ) or interaction ( $P=0.4639$ ); with post hoc two-  
1515 tailed t-tests with Šídák correction for effect of location for littermate controls ( $t_{29} = 5.614$ ,  $P <$   
1516  $0.0001$ ) and *eCN-DTA* mice ( $t_{29} = 4.731$ ,  $P = 0.0001$ ) mice.

1517 **j**, Total distance travelled during habituation and test phases of the three-chambered social  
1518 approach test (*eCN-DTA* mice: n=16, littermate controls: n=15). Repeated measure two-way



1519 ANOVA: main effect of phase ( $F_{1,29} = 358.9$ ,  $P < 0.0001$ ), genotype ( $F_{1,29} = 7.130$ ,  $P = 0.0123$ ),  
1520 and interaction ( $F_{1,29} = 5.461$ ,  $P = 0.0266$ ); with post hoc two-tailed t-tests with Šídák correction  
1521 for effect of genotype for the habituation phase ( $t_{58} = 3.433$ ,  $P = 0.0022$ ) but not test phase ( $t_{58} =$   
1522  $1.344$ ,  $P = 0.3343$ ).

1523 **k**, Total time spent in the open arms of an elevated plus maze (*eCN-DTA* mice:  $n=14$ , littermate  
1524 controls:  $n=14$ ; two-tailed unpaired t-test:  $t_{26} = 1.662$ ,  $P = 0.1086$ ).

1525 **l**, Total distance travelled in an elevated plus maze (*eCN-DTA* mice:  $n=15$ , littermate controls:  
1526  $n=16$ ; two-tailed unpaired t-test:  $t_{29} = 2.320$ ,  $P = 0.0276$ ).

1527 ns, not significant:  $P \geq 0.05$ . Data are presented as mean values  $\pm$  SEM.

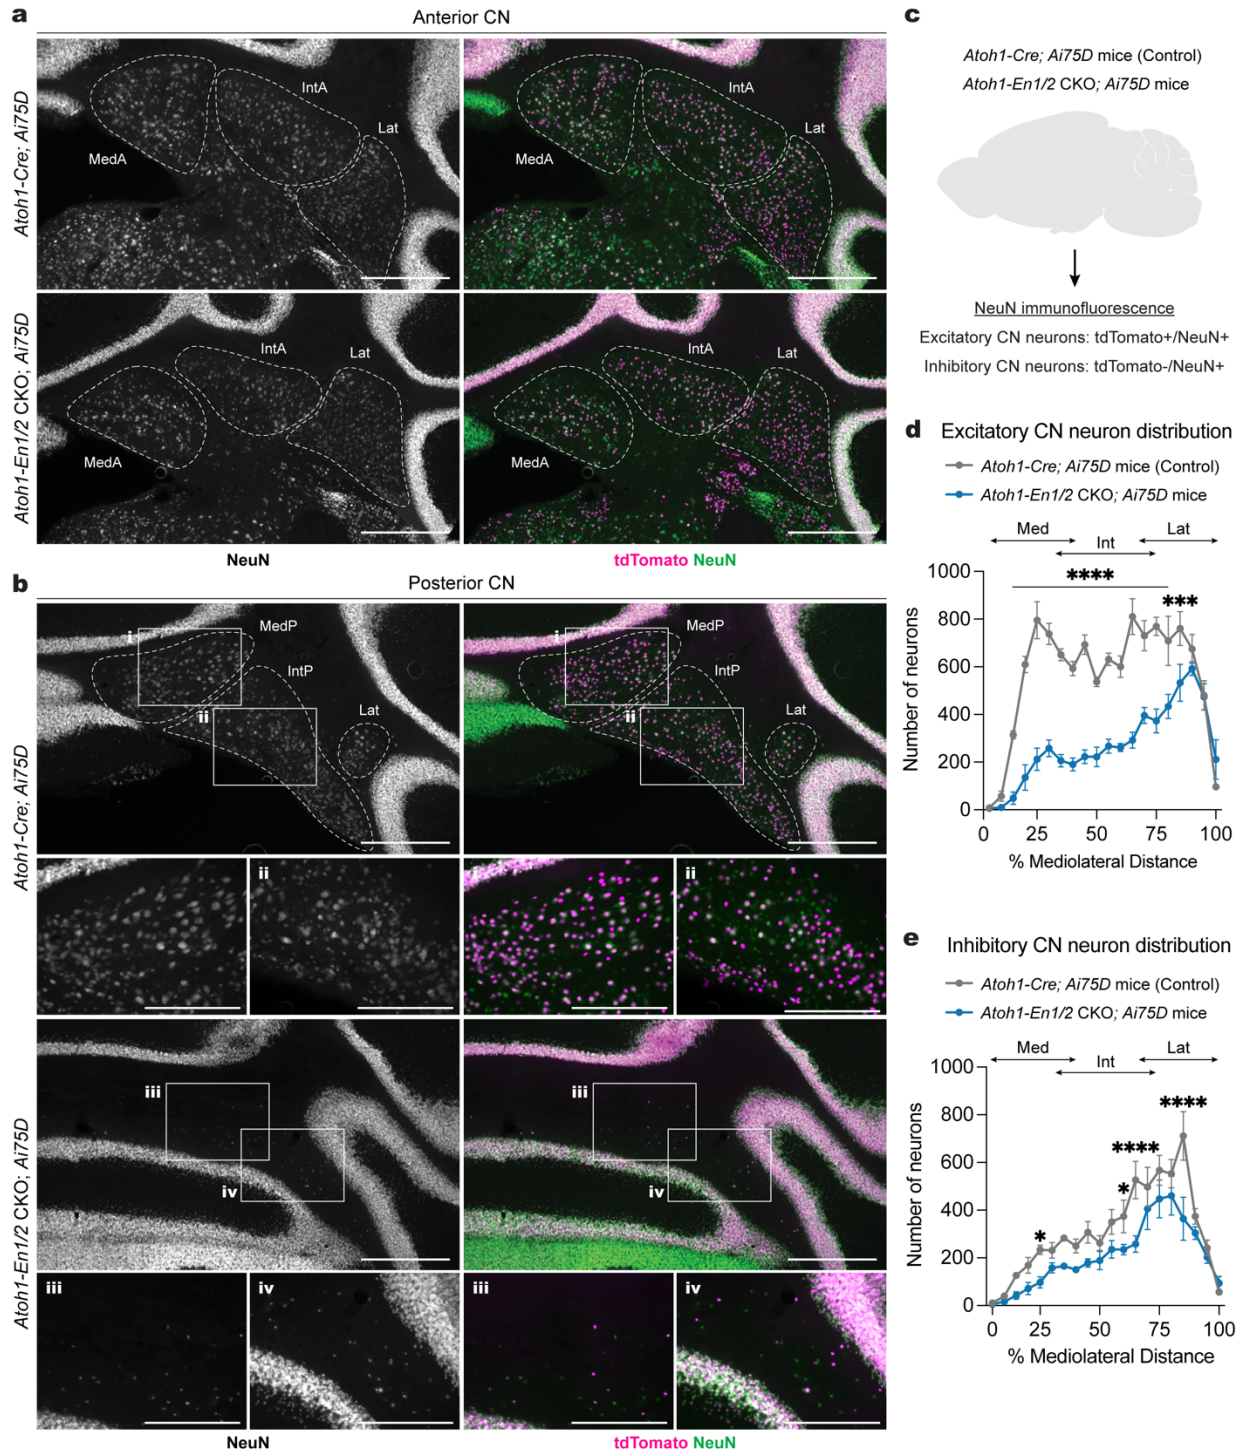

1528

1529 **Supplementary Fig. 8 | Inhibitory CN neurons are significantly reduced across the**  
 1530 **mediolateral axis in *Atoh1-En1/2* CKOs.**

1531 **a,b**, Representative images of immunofluorescent staining NeuN (single channel) and NeuN

1532 (green), tdTomato (magenta) co-labeling in of coronal sections of the anterior (**a**) and posterior

1533 **(b)** CN of *Atoh1-Cre; Ai75D* and *Atoh1-En1/2* CKO; *Ai75D* mice. Abbreviations: MedA=Anterior  
1534 medial; MedP=Posterior medial; IntA=Anterior interposed; IntP=Posterior interposed; Lat=Lateral.  
1535 Scale bars = 500 um, scale bars for **i-iv** = 100 um.

1536 **c**, Experimental design for quantifying excitatory and inhibitory CN neurons in *Atoh1-Cre; Ai75D*  
1537 (*Atoh1-Cre/+; R26<sup>LSL-nls-tdTomato/+</sup>*) and *Atoh1-En1/2* CKO; *Ai75D* (*Atoh1-Cre/+; En1<sup>flox/flox</sup>; En2<sup>flox/flox</sup>; R26<sup>LSL-nls-tdTomato/+</sup>*) mice.

1539 **d**, Quantification and distribution of excitatory CN neurons in half of the cerebellum (every second  
1540 section). Two-way ANOVA: main effect of % mediolateral distance ( $F_{19,120} = 31.38$ ,  $P < 0.0001$ ),  
1541 genotype ( $F_{1,120} = 400.1$ ,  $P < 0.0001$ ), and interaction ( $F_{19,120} = 8.830$ ,  $P < 0.0001$ ); with post hoc  
1542 two-tailed t-tests with uncorrected Fisher's LSD for effect of genotype for bin 10-80% (list of t  
1543 value for each bin:  $t_{120} = 4.029, 7.169, 8.828, 7.267, 6.726, 6.087, 7.103, 4.759, 5.516, 5.122,$   
1544  $7.85, 5.06, 6, 4.169$ ; all P values:  $P < 0.0001$ ), for bins 80-85% ( $t_{120} = 3.435$ ,  $P = 0.0008$ ), and no  
1545 other comparisons ( $P \geq 0.05$ ). Abbreviations: Med=medial; Int=interposed; Lat=lateral.

1546 **e**, Quantification and distribution of inhibitory CN neurons in half of the cerebellum (every second  
1547 section). Two-way ANOVA: main effect of % mediolateral distance ( $F_{19,120} = 23.97$ ,  $P < 0.0001$ ),  
1548 and genotype ( $F_{1,120} = 50.81$ ,  $P < 0.0001$ ), but not interaction ( $F_{19,120} = 1.659$ ,  $P = 0.0531$ ); with  
1549 post hoc two-tailed t-tests with uncorrected Fisher's LSD for effect of genotype for bin 20-25%  
1550 ( $t_{120} = 2.094$ ,  $P = 0.0384$ ), bin 55-60% ( $t_{120} = 2.141$ ,  $P = 0.0343$ ), bin 60-65% ( $t_{120} = 4.114$ ,  $P <$   
1551  $0.0001$ ), bin 80-85% ( $t_{120} = 5.316$ ,  $P < 0.0001$ ), and no other comparisons ( $P \geq 0.05$ ). Abbreviations:  
1552 Med=medial; Int=interposed; Lat=lateral.

1553 Data are presented as mean values  $\pm$  SEM.

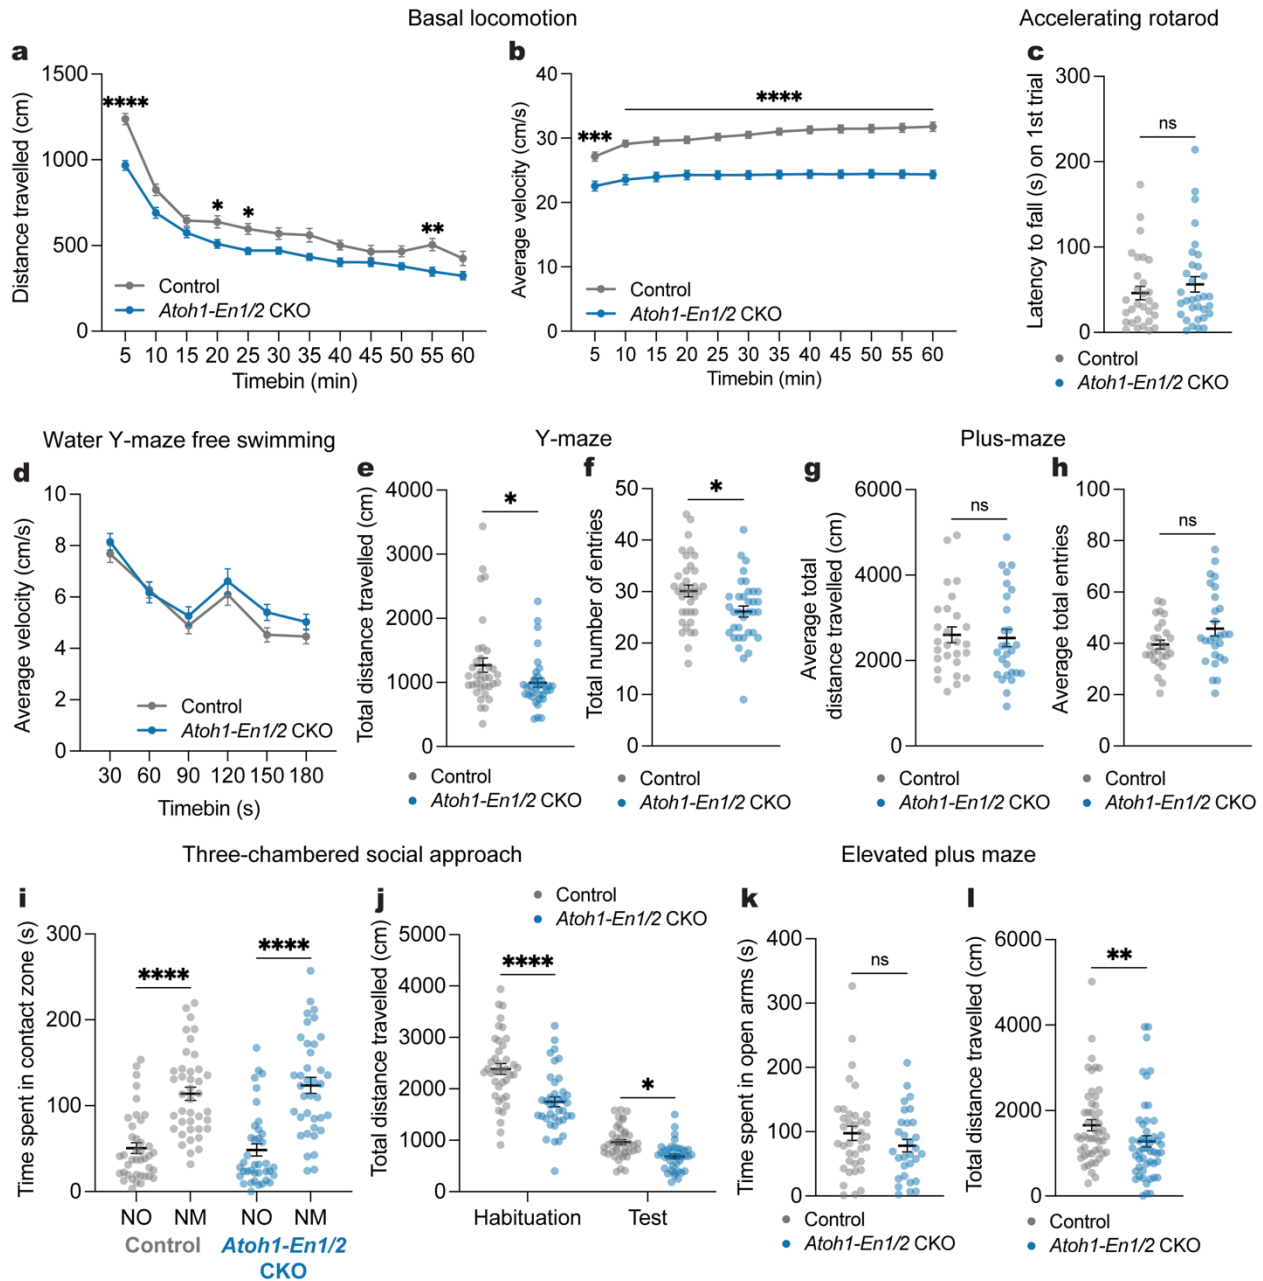

1554

1555 **Supplementary Fig. 9 | Motor coordination during behavior is task-dependent in *Atoh1-***  
 1556 ***En1/2* CKOs.**

1557 **a**, Distance travelled during basal locomotion by 5 min time bins (*Atoh1-En1/2* CKOs: n=33,  
 1558 littermate controls: n=35). Repeated measure two-way ANOVA: main effect of time ( $F_{7,310,482.5} =$   
 1559 171.0,  $P < 0.0001$ ), genotype ( $F_{1,66} = 15.45$ ,  $P = 0.0002$ ), and interaction ( $F_{11,726} = 3.120$ ,  $P =$   
 1560 0.0004); with post hoc two-tailed t-tests with Šídák correction for effect of genotype on 0-5 min



1561 ( $t_{65.21} = 6.250$ ,  $P < 0.0001$ ), 15-20 min ( $t_{61.20} = 3.012$ ,  $P = 0.0443$ ), 20-25 min ( $t_{59.87} = 3.358$ ,  $P =$   
1562  $0.0163$ ), 50-55 min ( $t_{60.88} = 3.556$ ,  $P = 0.0088$ ), and no other comparisons ( $P \geq 0.05$ ).

1563 **b**, Average velocity during basal locomotion by 5 min time bins (*Atoh1-En1/2* CKOs:  $n=33$ ,  
1564 littermate controls:  $n=35$ ). Repeated measure two-way ANOVA: main effect of time ( $F_{2,435,160.7} =$   
1565  $171.0$ ,  $P < 0.0001$ ), genotype ( $F_{1,66} = 57.43$ ,  $P = 0.0002$ ), and interaction ( $F_{11,726} = 4.381$ ,  $P <$   
1566  $0.0001$ ); with post hoc two-tailed t-tests with Šídák correction for effect of genotype on 0-5 min  
1567 ( $t_{65.45} = 4.355$ ,  $P = 0.0006$ ) and 5-60 min (t value for each bin:  $t_{65.45} = 4.355$ ,  $t_{61} = 5.693$ ,  $t_{63.58} =$   
1568  $5.927$ ,  $t_{62.8} = 5.916$ ,  $t_{63.54} = 6.755$ ,  $t_{61.95} = 7.332$ ,  $t_{62.74} = 7.867$ ,  $t_{65.1} = 7.819$ ,  $t_{65.56} = 7.863$ ,  $t_{65.83} =$   
1569  $7.695$ ,  $t_{66} = 7.698$ ,  $t_{65.53} = 7.589$ , all P values:  $P < 0.0001$ ).

1570 **c**, Latency to fall on the first trial of the accelerating rotarod test (*Atoh1-En1/2* CKOs:  $n=32$ ,  
1571 littermate controls:  $n=30$ ; Mann-Whitney *U* test:  $U = 417$ ,  $P = 0.3792$ ).

1572 **d**, Average swimming velocity during a three-minute swim (*Atoh1-En1/2* CKOs:  $n=35$ , littermate  
1573 controls:  $n=31$ ). Repeated measure two-way ANOVA: main effect of time ( $F_{5,320} = 0.5563$ ,  $P <$   
1574  $0.0001$ ), but not of genotype ( $P = 0.1350$ ) and interaction ( $P = 0.7335$ ).

1575 **e**, Total distance travelled during the Y-maze ( $n=35$  per genotype; Mann-Whitney *U* test:  $U = 405$ ,  
1576  $P = 0.0144$ ).

1577 **f**, Total number of arm entries in the Y-maze ( $n=35$  per genotype; two-tailed unpaired t-test:  $t_{68} =$   
1578  $2.548$ ,  $P = 0.0131$ ).

1579 **g**, Average total distance travelled during two days of testing in the plus-maze ( $n=27$  per genotype;  
1580 Mann-Whitney *U* test:  $U = 332.5$ ,  $P = 0.5857$ ).

1581 **h**, Average total number of arm entries during two days of testing in the plus-maze ( $n=27$  per  
1582 genotype; two-tailed unpaired t-test:  $t_{52} = 1.839$ ,  $P = 0.0717$ ).

1583 **i**, Total time in which the animal's nose was within the contact zone of a novel mouse (NM) and  
1584 novel object (NO) during the three-chamber social approach test (*Atoh1-En1/2* CKOs:  $n=38$ ,  
1585 littermate controls:  $n=40$ ). Repeated measure two-way ANOVA: main effect of location ( $F_{1,152} =$   
1586  $81.64$ ,  $P < 0.0001$ ), but not of genotype ( $P = 0.6191$ ) or interaction ( $P = 0.4360$ ); with post hoc

1587 two-tailed t-tests with Šídák correction for effect of location for *Atoh1-En1/2* CKOs ( $t_{152} = 6.854$ ,  
1588  $P < 0.0001$ ) and littermate controls ( $t_{152} = 5.913$ ,  $P < 0.0001$ ).

1589 **j**, Total distance travelled during habituation and test phases in the three-chamber social  
1590 approach test (*Atoh1-En1/2* CKOs: n=38, littermate controls: n=40). Repeated measure two-way  
1591 ANOVA: main effect of phase ( $F_{1,76} = 487.6$ ,  $P < 0.0001$ ), genotype ( $F_{1,76} = 22.58$ ,  $P < 0.0001$ ),  
1592 and interaction ( $F_{1,76} = 10.31$ ,  $P = 0.0019$ ); with post hoc two-tailed t-tests with Šídák correction  
1593 for effect of genotype for the habituation phase ( $t_{152} = 5.772$ ,  $P < 0.0001$ ) and test phase ( $t_{152} =$   
1594  $2.491$ ,  $P = 0.0275$ ).

1595 **k**, Total time spent in the open arms of the elevated plus maze (n=50 per genotype; Mann-Whitney  
1596 *U* test:  $U = 878$ ,  $P = 0.01$ ).

1597 **l**, Total distance travelled in the elevated plus maze (n=50 per genotype; Mann-Whitney *U* test: *U*  
1598  $= 467$ ,  $P = 0.2705$ ).

1599 ns, not significant:  $P \geq 0.05$ . Data are presented as mean values  $\pm$  SEM.

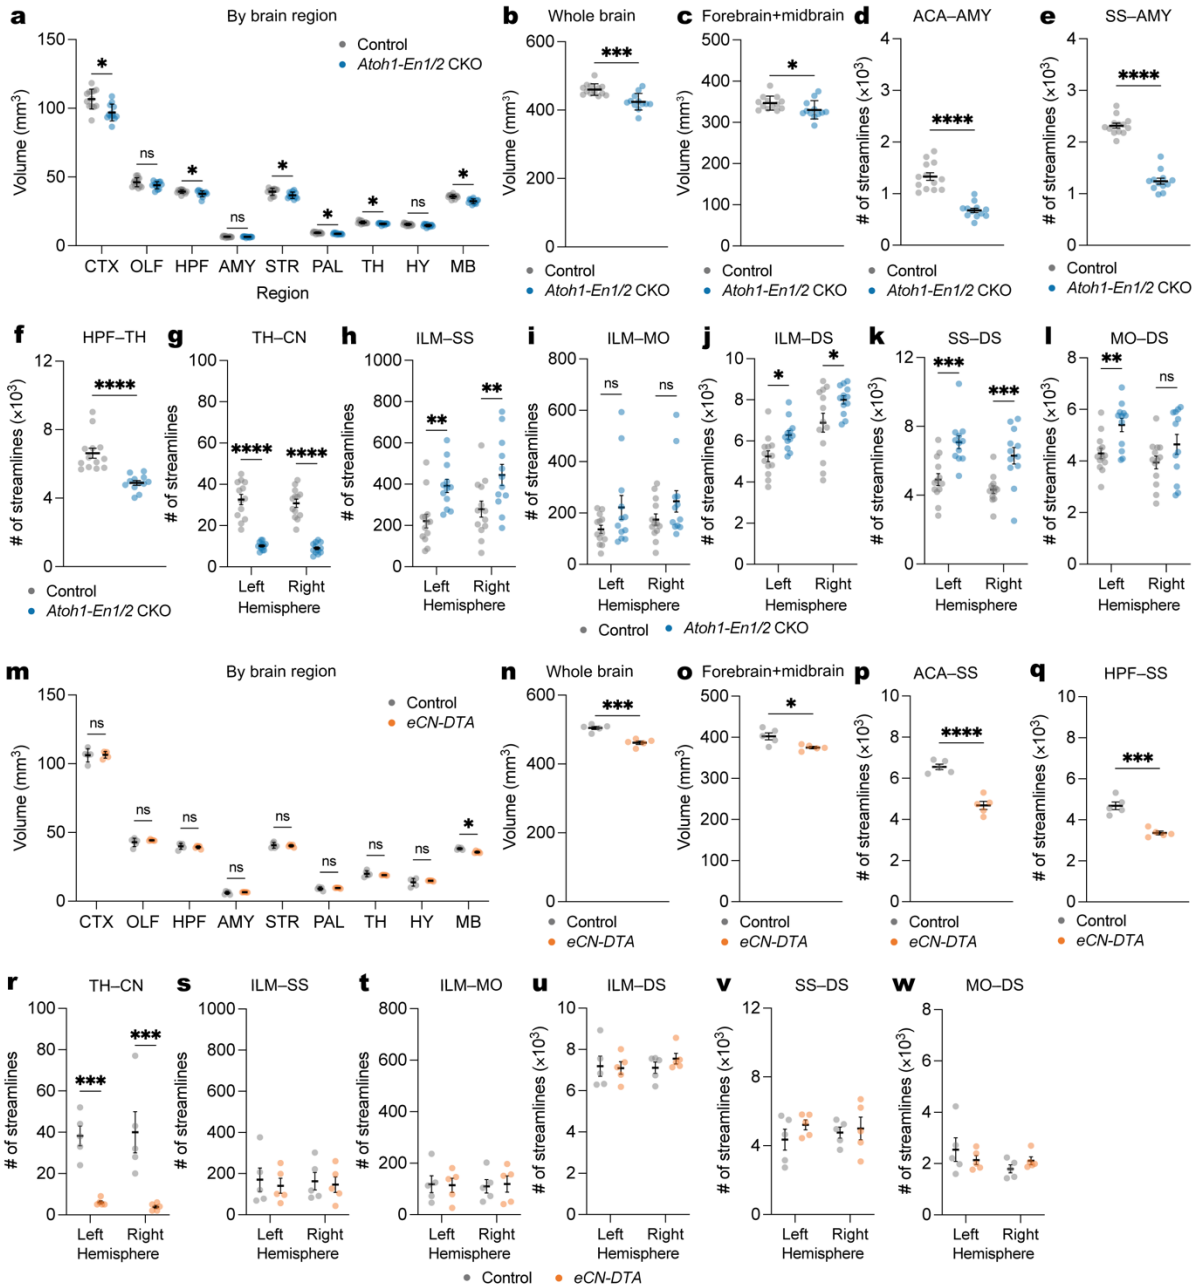

1600

1601 **Supplementary Fig. 10 | Brain volume and connectivity changes in *Atoh1-En1/2* CKO and**

1602 ***eCN-DTA* mice.**

1603 **a**, Quantification of regional brain volumes in *Atoh1-En1/2* CKOs (n=12) compared to littermate

1604 controls (n=13). Two-tailed unpaired t-tests to test for effect of genotype on CTX ( $t_{23} = 3.633$ ,  $P =$

1605 0.0014), HPF ( $t_{23} = 2.329$ ,  $P = 0.03$ ), STR ( $t_{23} = 2.612$ ,  $P = 0.016$ ), PAL ( $t_{23} = 3.143$ ,  $P = 0.005$ ),

1606 TH ( $t_{23} = 3.052$ ,  $P = 0.006$ ), MB ( $t_{23} = 5.665$ ,  $P < 0.0001$ ), HB ( $t_{23} = 11.16$ ,  $P < 0.0001$ ), CB ( $t_{23} =$   
1607  $11.15$ ,  $P < 0.0001$ ), other comparisons  $P \geq 0.05$ .

1608 **b**, Quantification of whole brain volume in *Atoh1-En1/2* CKOs compared to littermate controls  
1609 (*Atoh1-En1/2* CKOs:  $n=12$ , littermate controls:  $n=13$ ; two-tailed unpaired t-test:  $t_{23} = 4.298$ ,  $P =$   
1610  $0.0003$ ).

1611 **c**, Quantification of forebrain and midbrain combined volume in *Atoh1-En1/2* CKOs compared to  
1612 littermate controls (*Atoh1-En1/2* CKOs:  $n=12$ , littermate controls:  $n=13$ ; two-tailed unpaired t-test:  
1613  $t_{23} = 2.087$ ,  $P = 0.0481$ ).

1614 **d**, Quantification of average (left and right hemispheres) ACA-AMY tractography in *Atoh1-En1/2*  
1615 CKOs compared to littermate controls (*Atoh1-En1/2* CKOs:  $n=12$ , littermate controls:  $n=13$ ; two-  
1616 tailed unpaired t-test:  $t_{23} = 14.35$ ,  $P < 0.0001$ ).

1617 **e**, Quantification of average (left and right hemispheres) SS-AMY tractography in *Atoh1-En1/2*  
1618 CKOs compared to littermate controls (*Atoh1-En1/2* CKOs:  $n=12$ , littermate controls:  $n=13$ ; Mann-  
1619 Whitney  $U$  test:  $U = 0$ ,  $P < 0.0001$ ).

1620 **f**, Quantification of average (left and right hemispheres) HPF-TH tractography in *Atoh1-En1/2*  
1621 CKOs compared to littermate controls (*Atoh1-En1/2* CKOs:  $n=12$ , littermate controls:  $n=13$ ; two-  
1622 tailed unpaired t-test:  $t_{23} = 4.298$ ,  $P = 0.0003$ ).

1623 **g**, Quantification of TH-CN tractography in *Atoh1-En1/2* CKOs ( $n=12$ ) compared to littermate  
1624 controls ( $n=13$ ). Ordinary two-way ANOVA: main effect of genotype ( $F_{1,46} = 166.5$ ,  $P < 0.0001$ ),  
1625 but not of hemisphere ( $P = 0.3838$ ) or interaction ( $P = 0.8437$ ); with post hoc two-tailed t-tests  
1626 with uncorrected Fisher's LSD for effect of genotype for left hemisphere ( $t_{46} = 9.265$ ,  $P < 0.0001$ )  
1627 and right hemisphere ( $t_{46} = 8.985$ ,  $P < 0.0001$ ).

1628 **h**, Quantification of ILM-SS tractography in *Atoh1-En1/2* CKOs ( $n=12$ ) compared to littermate  
1629 controls ( $n=13$ ). Ordinary two-way ANOVA: main effect of genotype ( $F_{1,46} = 18.16$ ,  $P < 0.0001$ ),  
1630 but not of hemisphere ( $P = 0.1675$ ) or interaction ( $P = 0.9536$ ); with post hoc two-tailed t-tests



1631 with uncorrected Fisher's LSD for effect of genotype for left hemisphere ( $t_{46} = 3.055$ ,  $P = 0.0037$ )  
1632 and right hemisphere ( $t_{46} = 2.972$ ,  $P = 0.0047$ ).

1633 **i**, Quantification of ILM-MO tractography in *Atoh1-En1/2* CKOs ( $n=12$ ) compared to littermate  
1634 controls ( $n=13$ ). Ordinary two-way ANOVA: main effect of genotype ( $F_{1,46} = 5.585$ ,  $P = 0.024$ ), but  
1635 not of hemisphere ( $P = 0.3553$ ) or interaction ( $P = 0.8322$ ); with post hoc two-tailed t-tests with  
1636 uncorrected Fisher's LSD for effect of genotype for left hemisphere ( $t_{46} = 1.822$ ,  $P = 0.0750$ ) and  
1637 right hemisphere ( $t_{46} = 1.520$ ,  $P = 0.1353$ ).

1638 **j**, Quantification of ILM-DS tractography in *Atoh1-En1/2* CKOs ( $n=12$ ) compared to littermate  
1639 controls ( $n=13$ ). Ordinary two-way ANOVA: main effect of genotype ( $F_{1,46} = 11.94$ ,  $P < 0.0001$ )  
1640 and hemisphere ( $F_{1,46} = 29.03$ ,  $P < 0.0001$ ), but not of interaction ( $P = 0.9007$ ); with post hoc two-  
1641 tailed t-tests with uncorrected Fisher's LSD for effect of genotype for left hemisphere ( $t_{46} = 3.055$ ,  
1642  $P = 0.0037$ ) and right hemisphere ( $t_{46} = 2.972$ ,  $P = 0.0047$ ).

1643 **k**, Quantification of SS-DS tractography in *Atoh1-En1/2* CKOs ( $n=12$ ) compared to littermate  
1644 controls ( $n=13$ ). Ordinary two-way ANOVA: main effect of genotype ( $F_{1,46} = 32.43$ ,  $P < 0.0001$ ),  
1645 but not of hemisphere ( $P = 0.0662$ ) or interaction ( $P = 0.7773$ ); with post hoc two-tailed t-tests  
1646 with uncorrected Fisher's LSD for effect of genotype for left hemisphere ( $t_{46} = 4.228$ ,  $P = 0.0001$ )  
1647 and right hemisphere ( $t_{46} = 3.825$ ,  $P = 0.0004$ ).

1648 **l**, Quantification of MO-SS tractography in *Atoh1-En1/2* CKOs ( $n=12$ ) compared to littermate  
1649 controls ( $n=13$ ). Ordinary two-way ANOVA: main effect of genotype ( $F_{1,46} = 10.60$ ,  $P = 0.0021$ ),  
1650 but not of hemisphere ( $P = 0.0535$ ) or interaction ( $P = 0.4680$ ); with post hoc two-tailed t-tests  
1651 with uncorrected Fisher's LSD for effect of genotype for left hemisphere ( $t_{46} = 2.820$ ,  $P = 0.0071$ )  
1652 and right hemisphere ( $t_{46} = 1.785$ ,  $P = 0.0809$ ).

1653 **m**, Quantification of regional brain volumes in *eCN-DTA* mice ( $n=5$ ) compared to littermate  
1654 controls ( $n=5$ ). Two-tailed unpaired t-tests to test for effect of genotype on MB ( $t_8 = 4.935$ ,  $P =$   
1655  $0.001$ ) and CB ( $t_8 = 3.130$ ,  $P = 0.014$ ), other comparisons  $P \geq 0.05$ .

1656 **n**, Quantification of whole brain volume in *eCN-DTA* mice compared to littermate controls (n=5  
1657 per genotype; two-tailed unpaired t-test:  $t_8 = 6.346$ ,  $P = 0.0002$ ).

1658 **o**, Quantification of forebrain and midbrain combined volumes in *eCN-DTA* mice compared to  
1659 littermate controls (n=5 per genotype; two-tailed unpaired t-test:  $t_8 = 3.055$ ,  $P = 0.0157$ ).

1660 **p**, Quantification of average (left plus right hemispheres) ACA-SS tractography in *eCN-DTA* mice  
1661 compared to littermate controls (n=5 per genotype; two-tailed unpaired t-test:  $t_8 = 7.743$ ,  $P <$   
1662  $0.0001$ ).

1663 **q**, Quantification of average (left plus right hemispheres) HPF-STR tractography in *eCN-DTA*  
1664 mice compared to littermate controls (n=5 per genotype; two-tailed unpaired t-test:  $t_8 = 6.324$ ,  $P$   
1665  $= 0.0002$ ).

1666 **r**, Quantification of TH-CN tractography in *eCN-DTA* mice (n=5) compared to littermate controls  
1667 (n=5). Ordinary two-way ANOVA: main effect of genotype ( $F_{1,16} = 37.89$ ,  $P < 0.0001$ ), but not of  
1668 hemisphere ( $P = 0.9717$ ) or interaction ( $P = 0.7233$ ); with post hoc two-tailed t-tests with  
1669 uncorrected Fisher's LSD for effect of genotype for left hemisphere ( $t_{16} = 4.103$ ,  $P = 0.0008$ ) and  
1670 right hemisphere ( $t_{16} = 4.613$ ,  $P = 0.0003$ ).

1671 **s**, Quantification of ILM-SS tractography in *eCN-DTA* mice (n=5) compared to littermate controls  
1672 (n=5). Ordinary two-way ANOVA: no main effect of genotype ( $P = 0.6080$ ), hemisphere ( $P =$   
1673  $0.9875$ ) or interaction ( $P = 0.8883$ ).

1674 **t**, Quantification of ILM-MO tractography in *eCN-DTA* mice (n=5) compared to littermate controls  
1675 (n=5). Ordinary two-way ANOVA: no main effect of genotype ( $P = 0.9440$ ), hemisphere ( $P =$   
1676  $0.9600$ ) or interaction ( $P = 0.8281$ ).

1677 **u**, Quantification of ILM-DS tractography in *eCN-DTA* mice (n=5) compared to littermate controls  
1678 (n=5). Ordinary two-way ANOVA: no main effect of genotype ( $P = 0.6155$ ), hemisphere ( $P =$   
1679  $0.5876$ ) or interaction ( $P = 0.4505$ ).

1680 **v**, Quantification of SS-DS tractography in *eCN-DTA* mice (n=5) compared to littermate controls  
1681 (n=5). Ordinary two-way ANOVA: no main effect of genotype (P = 0.2886), hemisphere (P =  
1682 0.8391) or interaction (P = 0.5482).

1683 **w**, Quantification of MO-SS tractography in *eCN-DTA* mice (n=5) compared to littermate controls  
1684 (n=5). Ordinary two-way ANOVA: no main effect of genotype (P = 0.8636), hemisphere (P =  
1685 0.1664) or interaction (P = 0.1924).

1686 Abbreviations: CTX=cerebral cortex; OLF=olfactory bulb; HPF=hippocampal formation;  
1687 AMY=amygdala; STR=striatum; PAL=pallidum; TH=thalamus; HY=hypothalamus; MB=midbrain;  
1688 HB=hindbrain; CB=cerebellum; ILM=intralaminar nuclei; SS=primary somatosensory cortex;  
1689 MO=primary motor cortex; ACA = anterior cingulate cortex. ns, not significant:  $P \geq 0.05$ . Data are  
1690 presented as mean values  $\pm$  SD for **a,b,g,h** and mean value  $\pm$  SEM for **c-f,i-k**.

| eCN phenotype & behavior   | MedP-hM4Di         | <i>SepW1-En1/2</i> CKOs                            | <i>Atoh1-En1/2</i> CKOs                                     | eCN-DTA                       |
|----------------------------|--------------------|----------------------------------------------------|-------------------------------------------------------------|-------------------------------|
| eCN phenotype              | MedP eCN inhibited | MedP eCN gone MedA eCN reduced 50%                 | MedP & IntP eCN gone MedA & IntA eCN reduced 50%            | All eCN gone                  |
| Negative geotaxis P7 & P11 | NA                 | P                                                  | X                                                           | X                             |
| Righting reflex P7         | NA                 | P                                                  | P                                                           | X                             |
| Footprint                  | P                  | P                                                  | X                                                           | X                             |
| Basal locomotion           | P                  | P                                                  | X                                                           | X                             |
| Accelerating rotarod       | P                  | P                                                  | X                                                           | P                             |
| Water Y maze               | reversal           | P                                                  | Initial & reversal                                          | P                             |
| Y-maze                     | P                  | P                                                  | X                                                           | P                             |
| Plus-maze                  | NA                 | NA                                                 | X                                                           | P                             |
| Social Preference          | NA                 | NA                                                 | P                                                           | P                             |
| Elevated Plus Maze         | NA                 | NA                                                 | P                                                           | P                             |
| Grooming                   | NA                 | NA                                                 | P                                                           | P                             |
| Diffusion MRI              | NA                 | NA                                                 | Increased connectivity thalamo-cortical-striatal            | No change                     |
| Compensation               | NA                 | From remaining eCN and/or extracerebellar circuits | Extracerebellar circuits interfere with non-motor behaviors | From extracerebellar circuits |

1691

1692 **Supplementary Fig. 11 | Summary of results.**

1693 Legend: ✓ = no difference; NA = not applicable; X = impairment.
